# Supplementary material for: Surfactant free fabrication and improved charge carrier separation induced enhanced photocatalytic activity of {001} facet exposed unique octagonal BiOCl nanosheets
Source: Royal Society of Chemistry journal article supplement (doi:10.1039/c6cp01740a), 2016-01-01
Supplement: c6cp01740a1.pdf [file c6cp01740a1.pdf]

## Supplementary Information

### **Surfactant Free Fabrication and Improved Charge Carrier Separation Induced Enhanced Photocatalytic Activity of {00} Facet Exposed Unique Octagonal BiOCl Nanosheets**

Zeeshan Haider, Jin You Zheng and Young Soo Kang\*

Korea Center for Artificial Photosynthesis and Department of Chemistry,  
Sogang University, Seoul 121-742, Republic of Korea

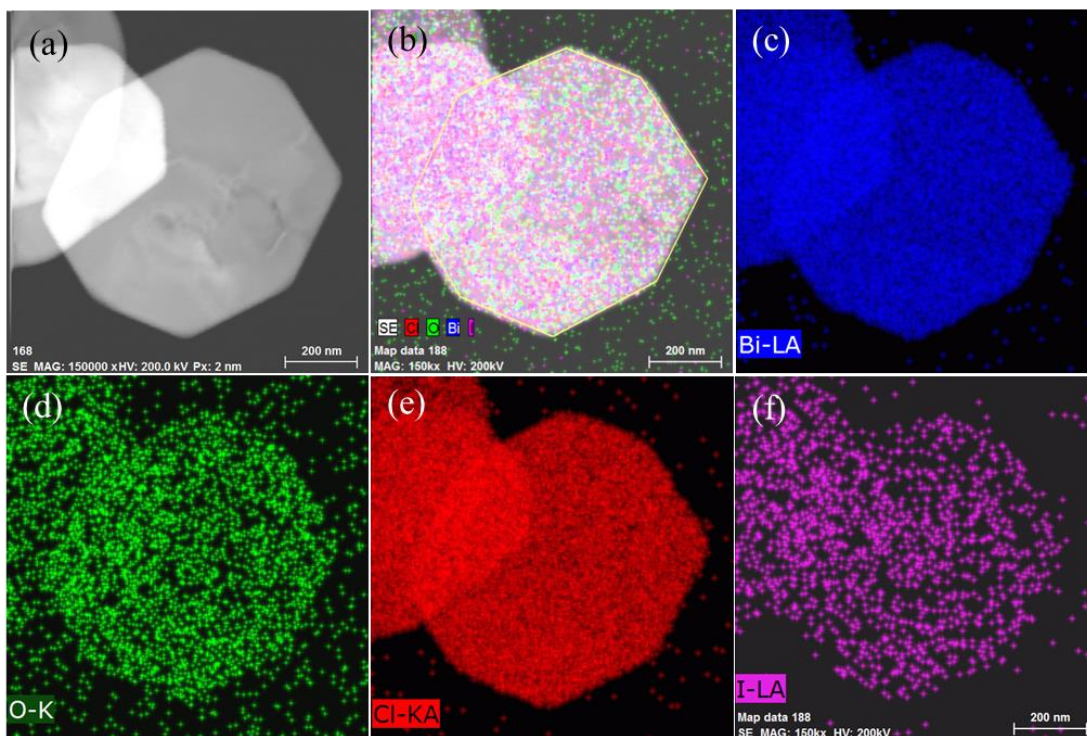

**Figure S1(A):** TEM image (a), diffused elemental mapping (b), elemental mapping of bismuth (c), oxygen (d), chlorine (e) and iodine (f).

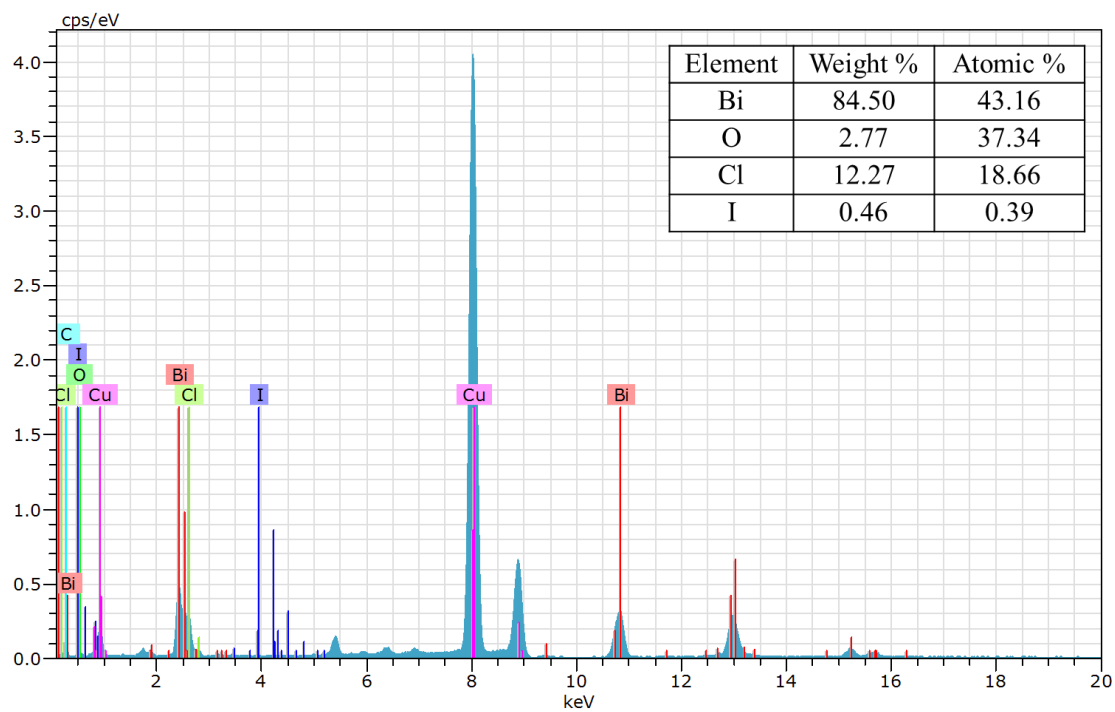

**Figure S1 (B):** EDX spectrum and elemental compositions of {001} BiOCl NS.

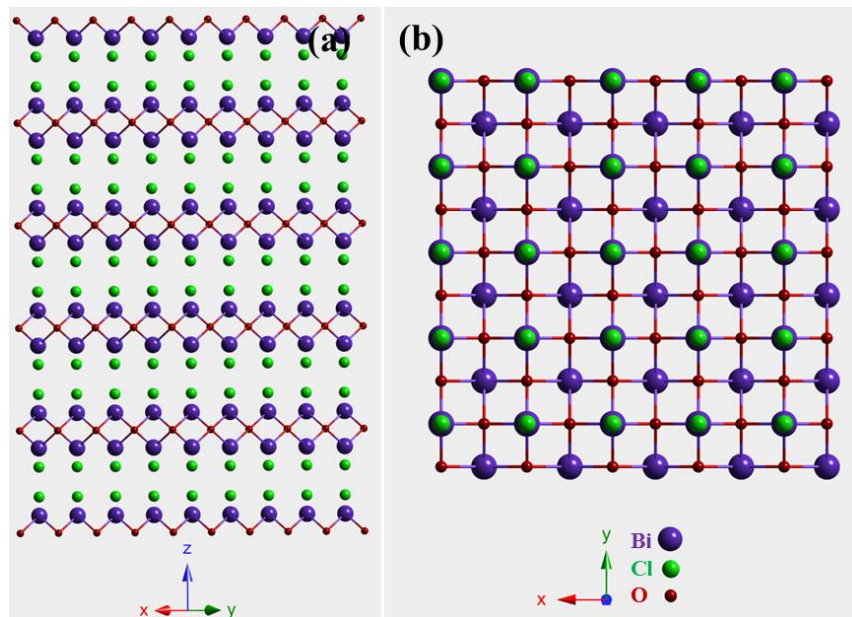

**Figure S2:** Crystal model (a) and c-axis view of {001} BiOCl NS.

## Procedure for calculations of percentage exposure of {001} facet

### (a): {001} BiOCl NS

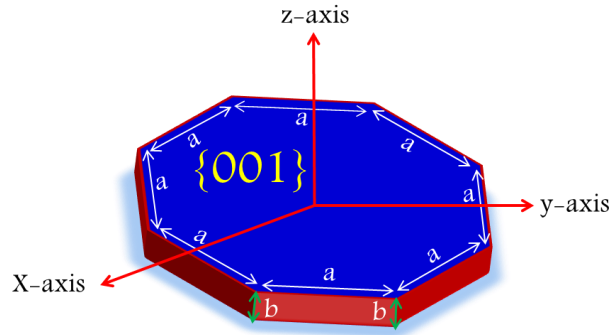

Area of {001} facet,  $A = 2(1 + 2\sqrt{2}) a^2$

Area of side facets,  $B = ab$

Percentage of {001} facet =  $\{2A/(2A + 8ab)\} \times 100$

### (b): Pristine BiOCl

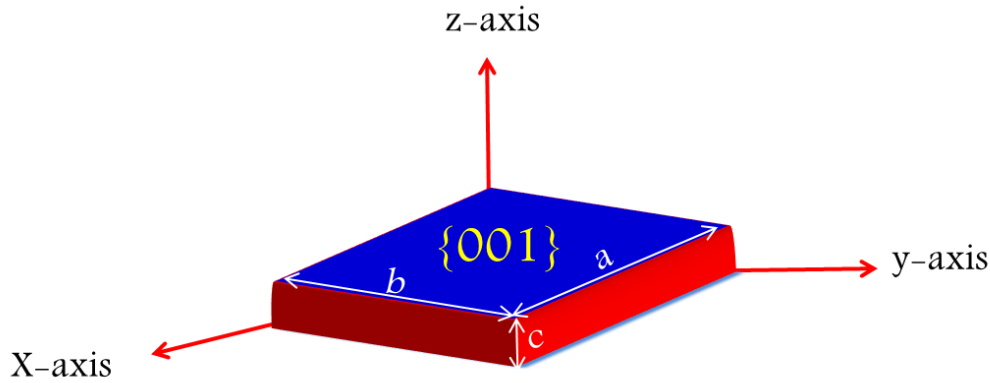

Percentage of {001} facet =  $\{2ab/2(ab + ac + bc)\} \times 100$

**Figure S3:** Geometrical models for calculating percentage exposure of {001} crystal facet of (a): {001} BiOCl NS and (b): Pristine BiOCl.



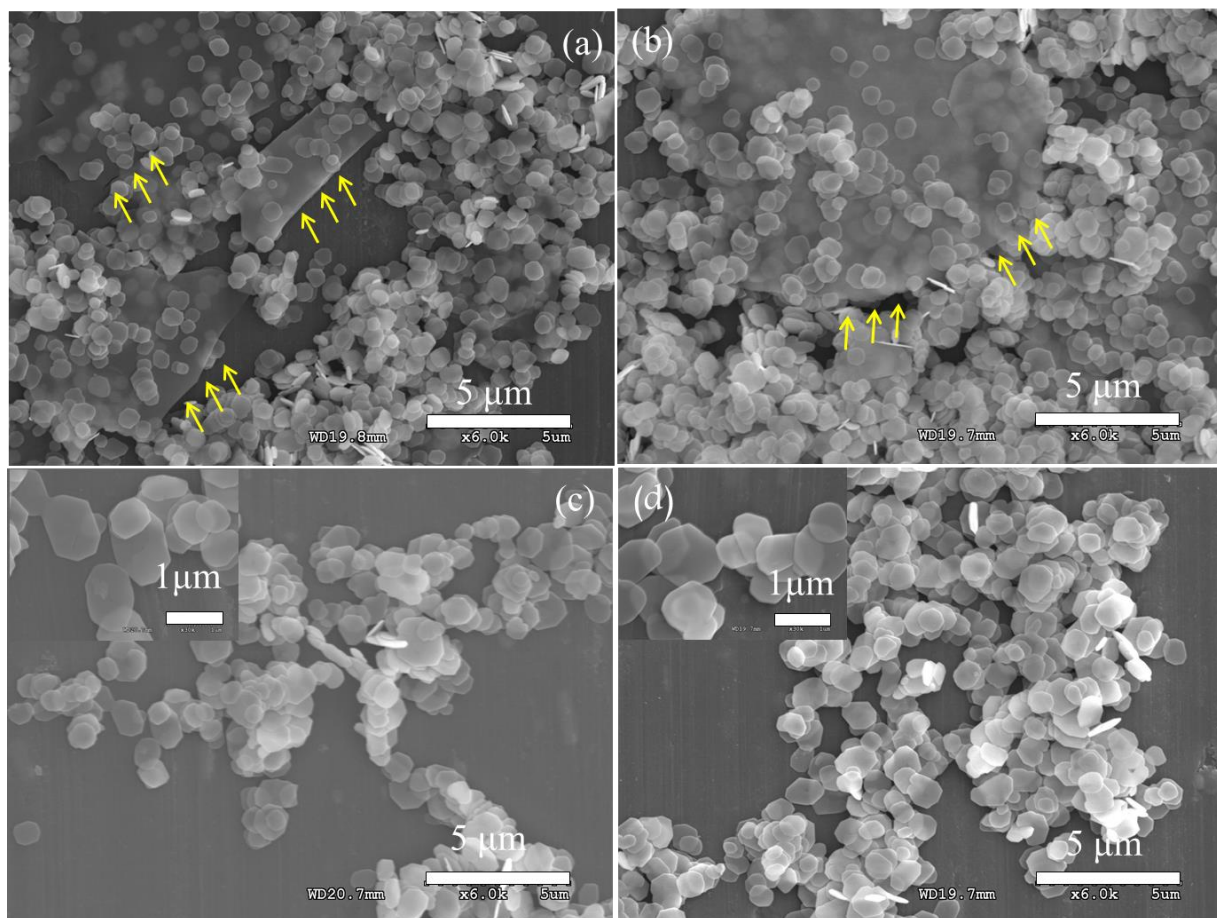

**Figure S5:** SEM images of {001} BiOCl NS prepared under varying amount of solvent ratio of ethanol/DI water, (a) 6/9, (b) 4/11, (c) 2/13 and (d) 1/14 ml.

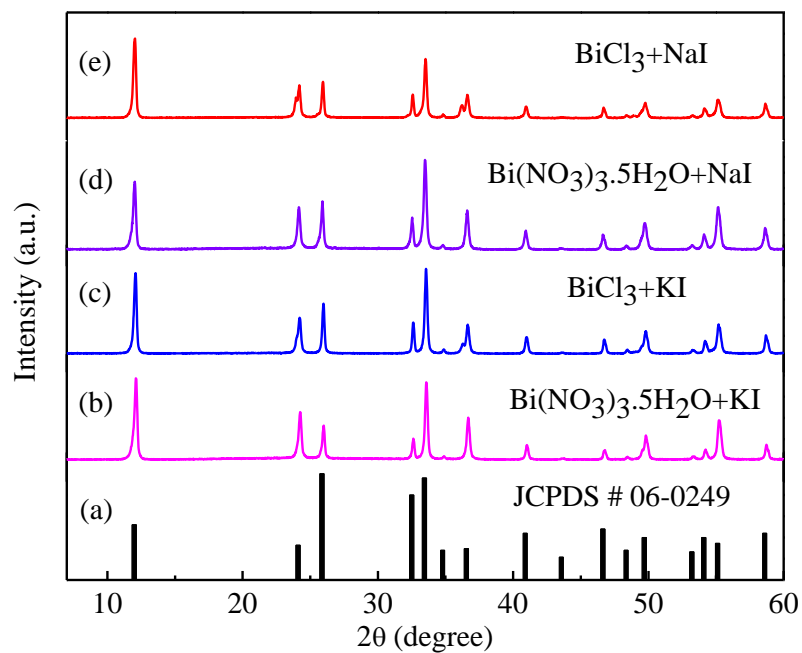

**Figure S6:** XRD patterns, standard BiOCl (a) and product with different Bi and I precursors, Bi(NO<sub>3</sub>)<sub>3</sub>·5H<sub>2</sub>O+KI (b), BiCl<sub>3</sub>+KI (c), Bi(NO<sub>3</sub>)<sub>3</sub>·5H<sub>2</sub>O+NaI (d) and BiCl<sub>3</sub>+ NaI (e).



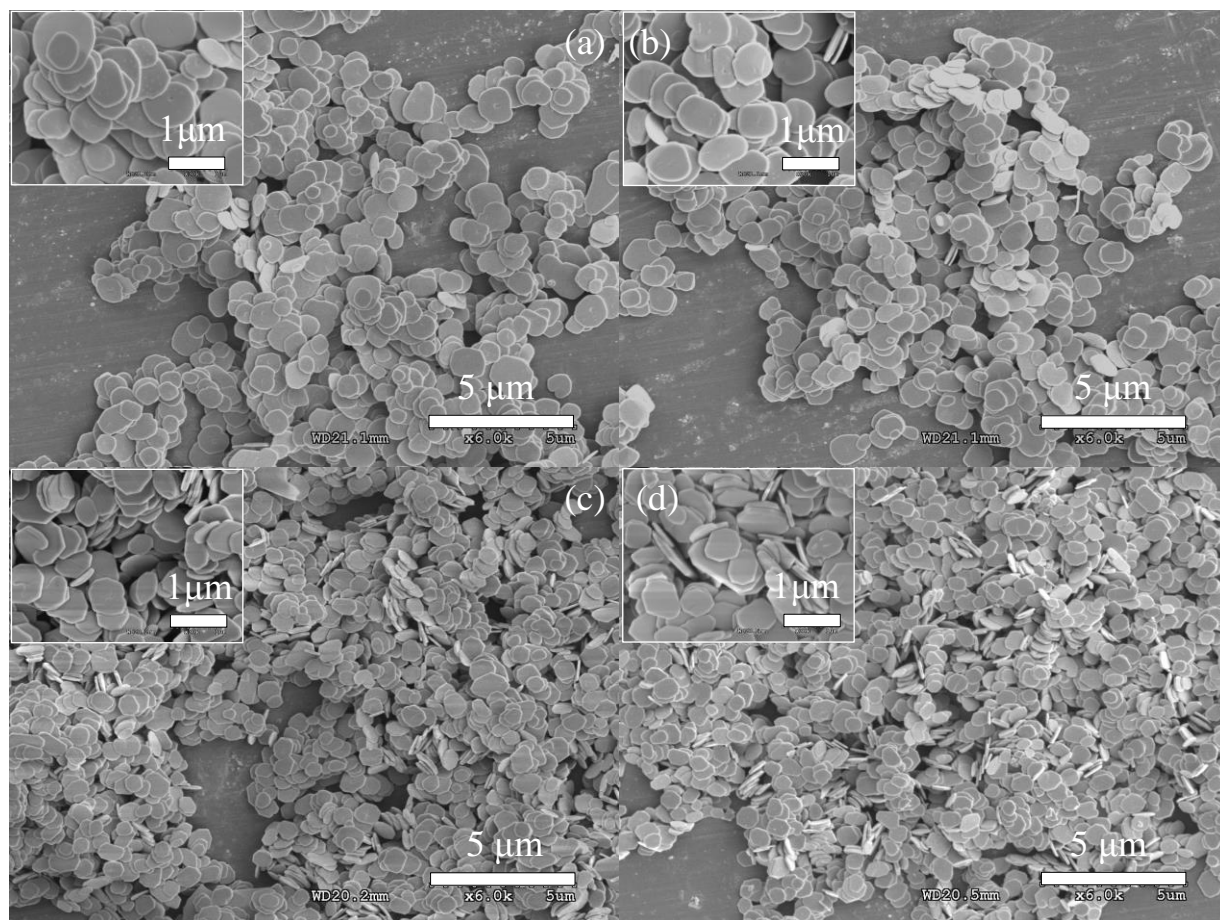

**Figure S7:** SEM images of products with different Bi and I precursors, Bi(NO<sub>3</sub>)<sub>3</sub>·5H<sub>2</sub>O+KI (a), Bi(NO<sub>3</sub>)<sub>3</sub>·5H<sub>2</sub>O+NaI (b), BiCl<sub>3</sub>+KI (c) and BiCl<sub>3</sub>+ NaI (d).

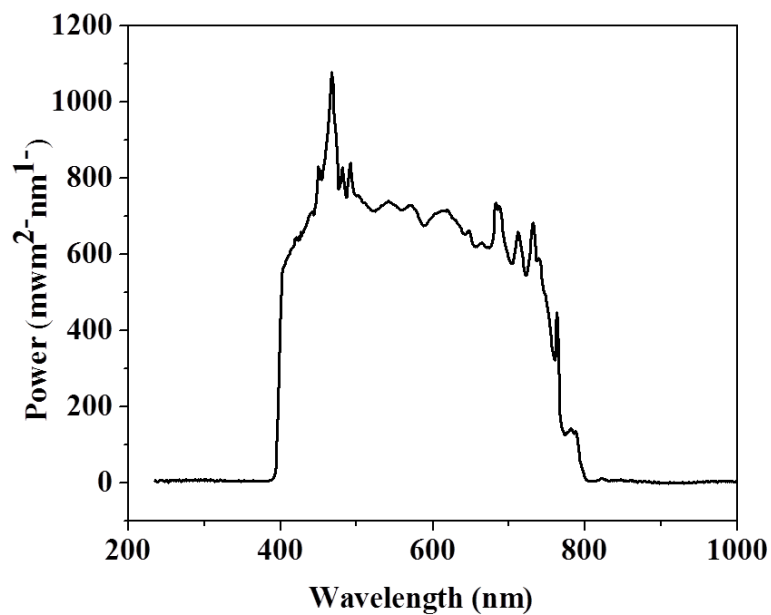

**Figure S8:** Output irradiance spectrum of Xenon lamp Max-302, Asahi spectra, equipped with visible mirror module and 400 nm long pass optical filter. Distance between collimating lens and photoreactor was adjusted 20 cm, irradiation area was 2.6 cm × 2.6 cm.

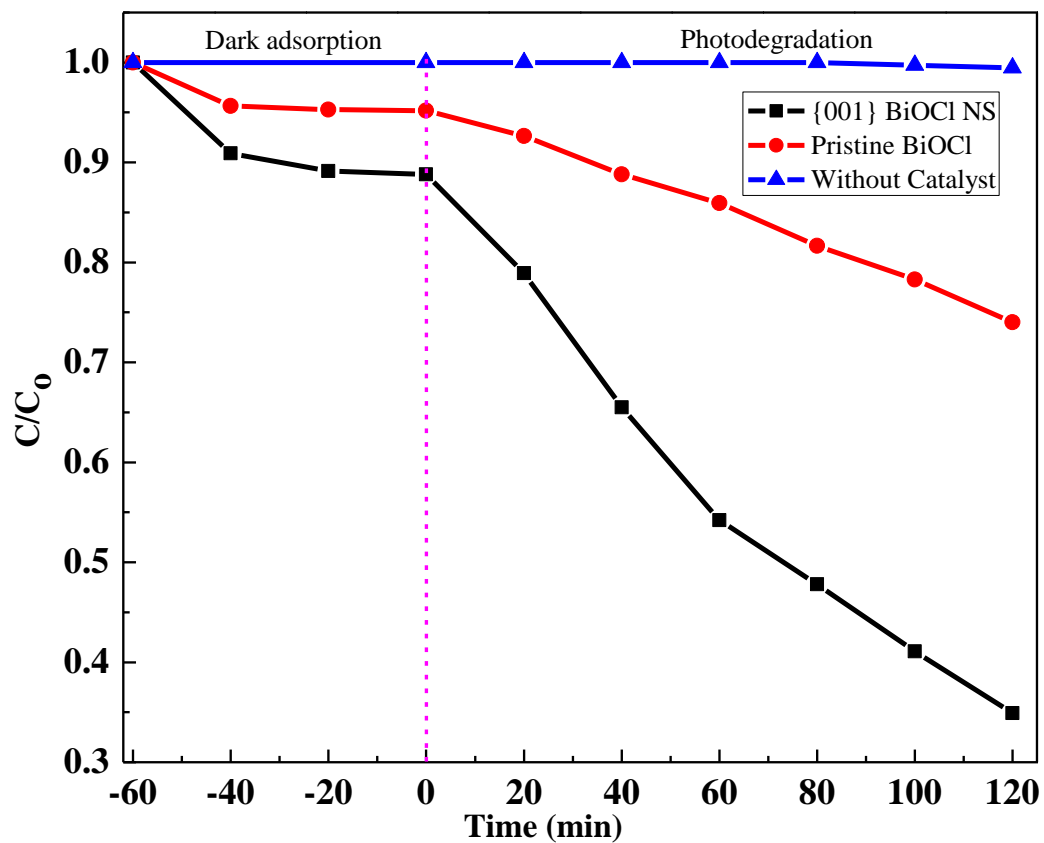

**Figure S9:** Adsorption and photodegradation curves of RhB versus time under dark and visible light illumination ( $\lambda > 400$  nm).

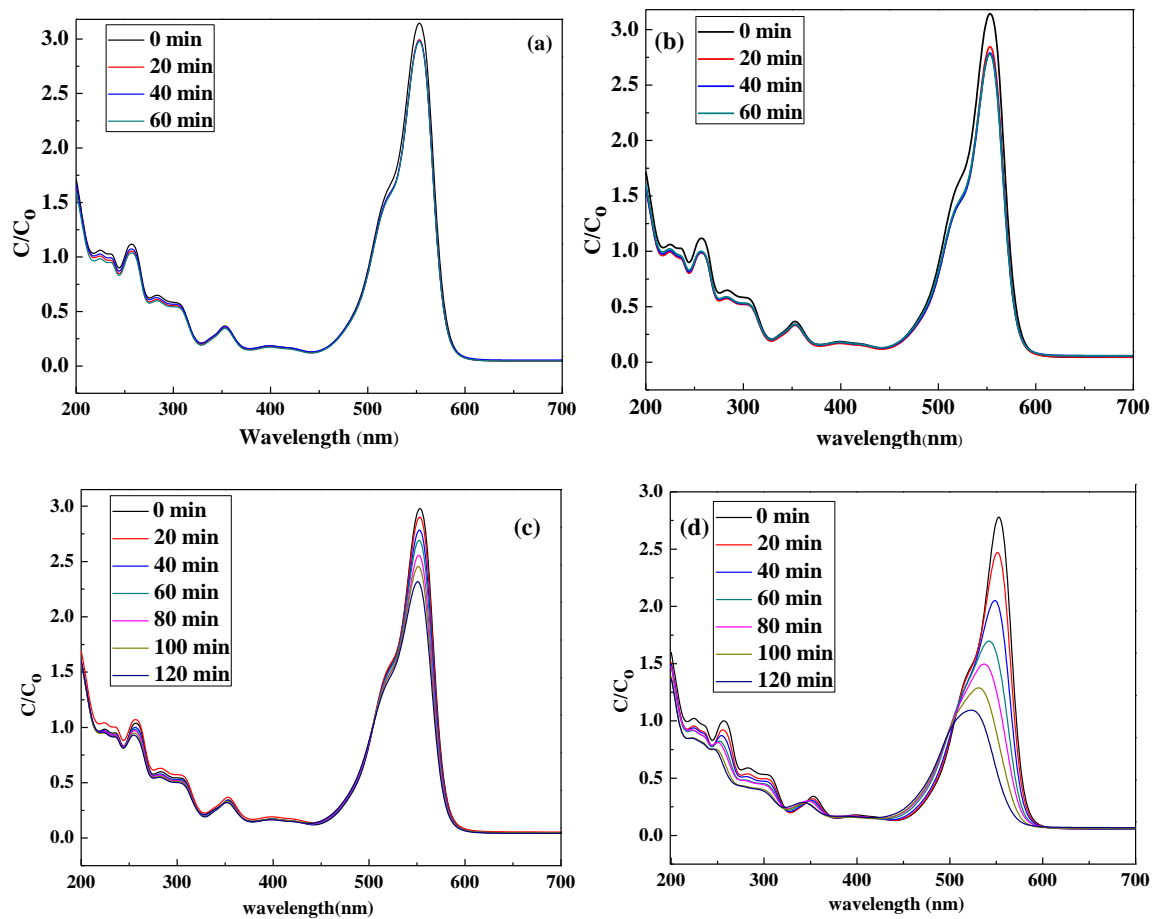

**Figure S10:** UV-Visible absorption spectra of RhB after dark adsorption (a), after photodegradation (b) by pristine BiOCl; dark adsorption (c) and after photodegradation (d) by {001} BiOCl NS.

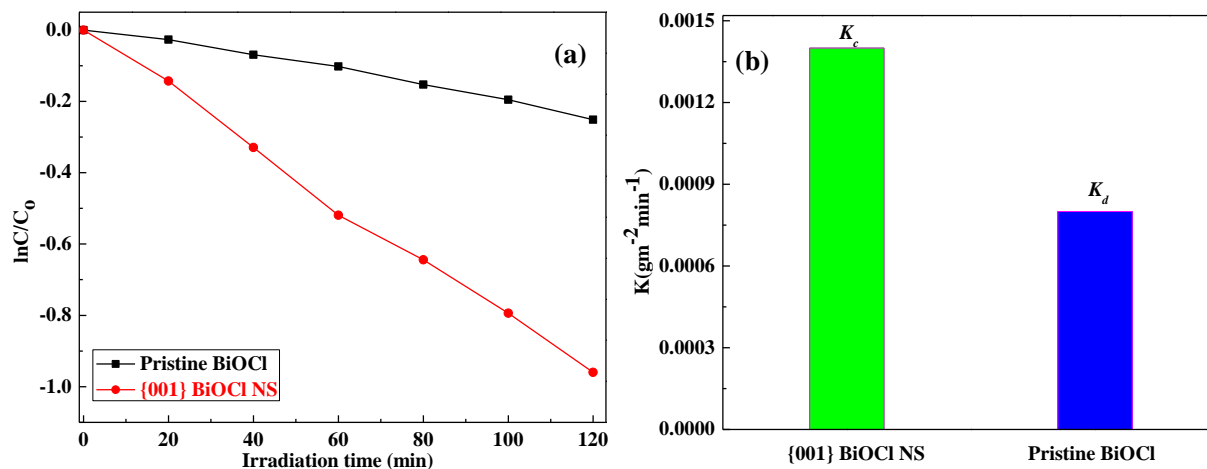

**Figure S11:** Plots of (a)  $\ln(C/C_0)$  versus irradiation time and (b) rate of reaction for photodegradation of RhB normalized to BET surface area of pristine BiOCl and {001} BiOCl NS.

### Figure S12: Procedure for calculation of photonic efficiency, PE ( $\Phi$ )

Photonic efficiency for photodegradation of RhB ( $\phi$ ) as a function of irradiation time in term of moles can be expressed as follow,<sup>1</sup>

$$\phi(\%) = \frac{\text{degradation rate of RhB (mole/sec)}}{\text{moles of incident photons (mole/sec)}} \times 100$$

PE can also be expressed by following relation.<sup>2</sup>

$$\phi(\%) = \frac{d[x]/dt}{d[h\nu]/dt} \times 100$$

In above expression,  $d[x]/dt$  photodegradation rate of RhB (mole/sec), whereas  $d[h\nu]/dt$  represent incident photons (moles/sec) on the sample. Moles of incident photons can be obtained by dividing total energy of incident photons with energy of single photon and Avogadro's number,  $N_A = 6.02 \times 10^{23} \text{ mol}^{-1}$ .<sup>3</sup>

$$\text{moles of photons} = \frac{E_{\text{total}}}{N_A E_{\text{photon}}}$$

Energy of single photon at a given wavelength is calculated from following equation, using planks constant,  $h = 6.26 \times 10^{-34} \text{ JS}$  and speed of light,  $c = 3 \times 10^8 \text{ m/s}$ .<sup>3</sup>

$$E_{\text{photon}} = \frac{hc}{\lambda}$$

For monochromatic source of radiation moles of incident photons can be calculated from following expression.<sup>3</sup>

$$\text{moles of photons} = \frac{E_{\text{total}}}{N_A E_{\text{photon}}} = \frac{PSt\lambda_{\text{inc.}}}{N_A hc}$$

In above expression,  $S$  is the irradiation area ( $\text{m}^2$ ),  $t$  is illumination time (sec) and  $P$  is the power density of incident light.<sup>3</sup> However when incident light is composed of wide range of wavelengths, moles of incident photons can be calculated by integrating over spectral window using following expression.<sup>4</sup>

$$\text{moles of photons} = \frac{E_{\text{total}}}{N_A E_{\text{photon}}} = \frac{St}{N_A} \int_{\lambda_1}^{\lambda_2} \frac{P_{\lambda} \lambda d\lambda}{hc}$$

Spectral width from 400 to 600 nm was chosen for the calculation of  $\phi$ , hence integration was performed in the mentioned range of wavelength. The overall expression for the calculation of PE can be expressed as follow.

$$\phi(\%) = \frac{n_{\text{RhB}}/dt}{\left( \frac{St}{N_A} \int_{\lambda_{400 \text{ nm}}}^{\lambda_{600 \text{ nm}}} \frac{P_{\lambda} \lambda d\lambda}{hc} \right) / dt} \times 100$$

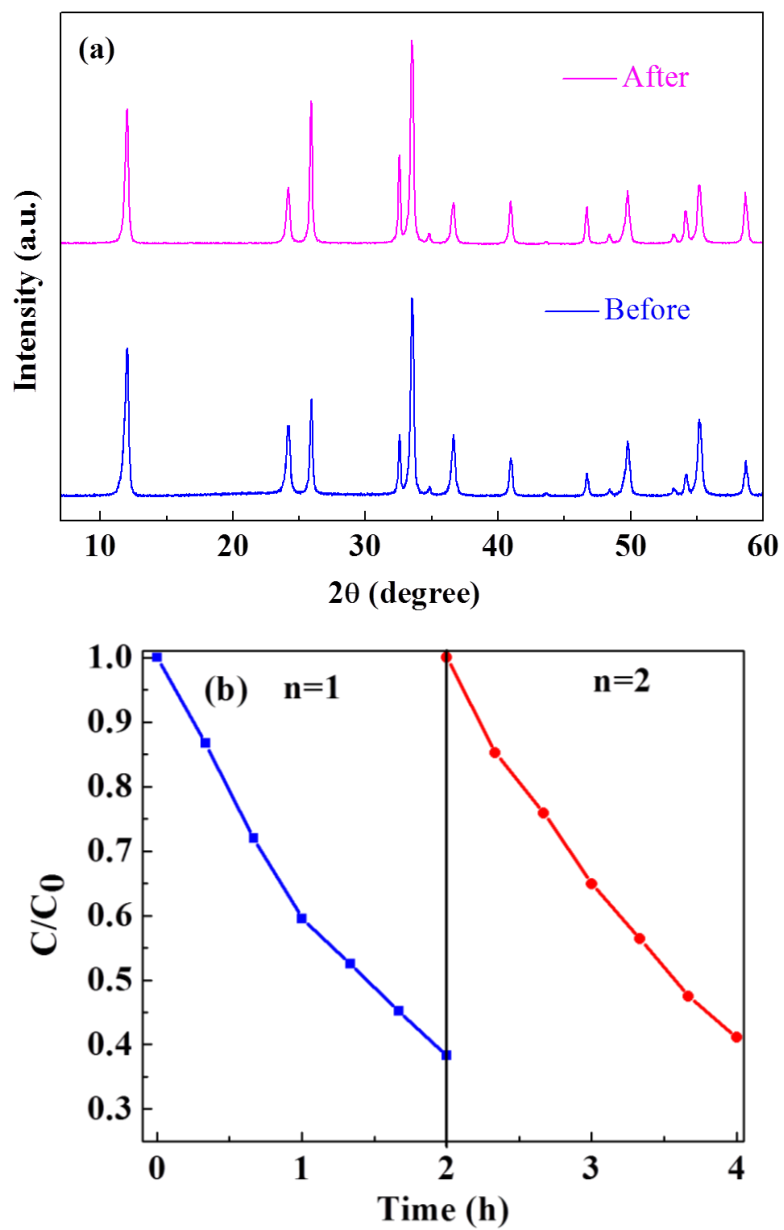

**Figure S13:** XRD patterns before and after photodegradation (a) and (b) recycling test for photodegradation of RhB by {001} BiOCl NS.

**Table S1:** Fitting parameters for time resolved PL decay curves.

| Sample         | $\tau_1$<br>(ns) | $\tau_2$<br>(ns) | $\tau_3$<br>(ns) | $B_1$   | $B_2$   | $B_3$   | $\langle\tau\rangle_{\text{amp.}}$<br>(ns) | $\langle\tau\rangle_{\text{int.}}$<br>(ns) | Mean<br>$\langle\tau\rangle_{\text{amp.}}$ (ns) | Mean $\langle\tau\rangle_{\text{int.}}$<br>(ns) |
|----------------|------------------|------------------|------------------|---------|---------|---------|--------------------------------------------|--------------------------------------------|-------------------------------------------------|-------------------------------------------------|
| {001}BiOCl NS  | 32.481           | 0.542            | 3.836            | 427.29  | 9856.28 | 1752.49 | 2.16                                       | 18.48                                      | 1.94                                            | 17.24                                           |
|                | 30.451           | 0.458            | 3.138            | 216.9   | 6242.33 | 1049.03 | 1.7                                        | 16.68                                      |                                                 |                                                 |
|                | 29.82            | 0.497            | 3.34             | 329.5   | 7784.67 | 1543.99 | 1.95                                       | 16.56                                      |                                                 |                                                 |
| Pristine BiOCl | 1.986            | 0.544            | 7.25             | 915.42  | 2606.55 | 104.61  | 1.1                                        | 2.47                                       | 1.07                                            | 2.52                                            |
|                | 2.023            | 0.504            | 7.645            | 1444.16 | 4437.71 | 177.63  | 1.01                                       | 2.3                                        |                                                 |                                                 |
|                | 1.991            | 0.533            | 7.678            | 1212.36 | 3872.91 | 176.3   | 1.11                                       | 2.79                                       |                                                 |                                                 |



**Table S2:** Photonic efficiency ( $\phi$ ) of {001} BiOCl NS for photodegradation of RhB under visible light illumination with long pass filter  $\lambda > 400$  nm.

| Sample         | Illumination Time (h) | [x] of RhB (mmol)      | d[x]/dt (mmol*/s)       | dh[v]/dt (mmol/s)      | $\phi$ (%) |
|----------------|-----------------------|------------------------|-------------------------|------------------------|------------|
|                | 0                     | $2.505 \times 10^{-3}$ | -                       | -                      |            |
| {001} BiOCl NS | 2                     | $1.545 \times 10^{-3}$ | $2.1467 \times 10^{-7}$ | $4.409 \times 10^{-4}$ | 0.0486     |
| Pristine BiOCl | 2                     | $5.511 \times 10^{-4}$ | $7.6545 \times 10^{-8}$ | $4.409 \times 10^{-4}$ | 0.0173     |

\* mmol of RhB photodegraded after 2 h of illumination were calculated using Figure S9, considering both direct and indirect photoexcitation.

## References

1. Zhuang, S.; Xu, X.; Pang, Y.; Hu, J.; Yang, C.; Tong, L.; Zhou, Y. *RSC. Adv.*, **2013**, 3, 20422-20428.
2. Lee, K.; Ruddy, D. A.; Dukovic, G.; Neale, N. R. *J. Mater. Chem. A*, **2015**, 3, 8115-8112.
3. Yu, Y. G.; Chen, G.; Hao, L. X.; Zhou, Y. S.; Wang, Y.; Pei, J.; Sun, J. X.; Han, Z. H. *Chem. Commun.*, **2013**, 49, 10142-10144.
4. Braslavsky, S. E.; Braun, A. M.; Emeline, A. V.; Litter, M. I.; Palmisano, L.; Parmon, V. N.; Serpone, N.; Bahnemann, D.; Bolton, J. R.; Cassano, A. E.; Koopal, L. K.; Ryabchuk, V. K.; Savinov, E.; Alfano, O. M.; Anpo, M.; Augugliaro, V.; Bohne, C.; Esplugas, S.; Oliverson, E.; Sonntag, v.; Weiss, R. G. Schiavello, M. Glossary of terms used in Photocatalysis and radiocatalysis, *IUPAC Recommendations*, **2010**.
5. He, F.; Chen, G.; Yu.; Y.; Zhou, Y.; Zheng, Y.; Hao, S. *Chem. Commun.*, **2015**, 51, 6824-6827.
